# Supplementary material
Source: PubMed Central journal article supplement (PMC1895530)
Supplement: blood_blood-2006-02-003921_1.pdf [file blood_blood-2006-02-003921_1.pdf]

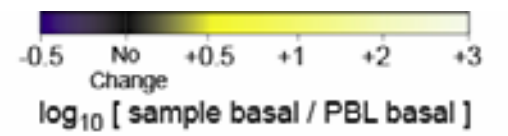

Resting Cells, Gated CD20+

Normal B Cells

Lymphoma Cell Line

FL Tumor B Cells

PBMC-D07

PBMC-D09

PBMC-D10

Ramos

FL-P07

FL-P09

FL-P10

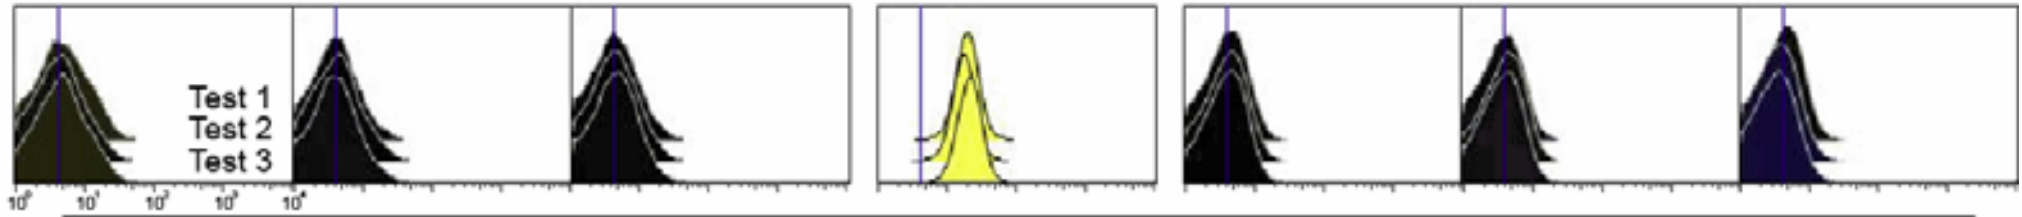

p-Btk

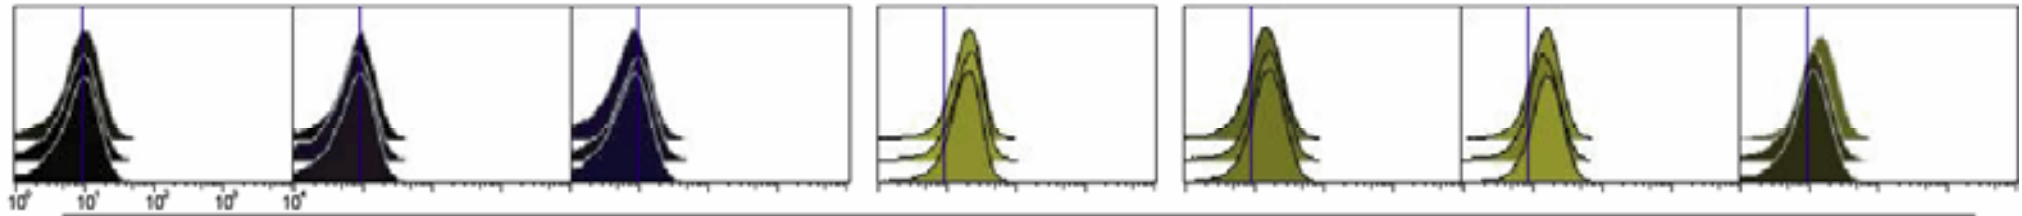

p-Syk

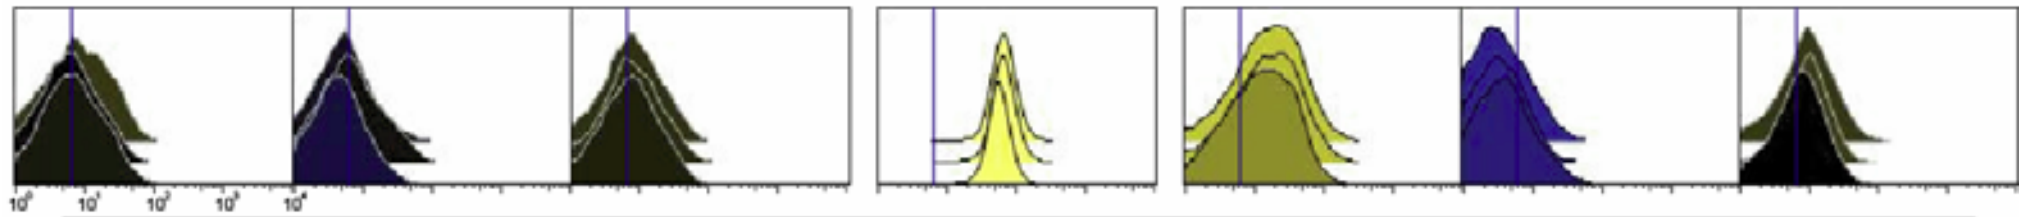

p-Erk1/2

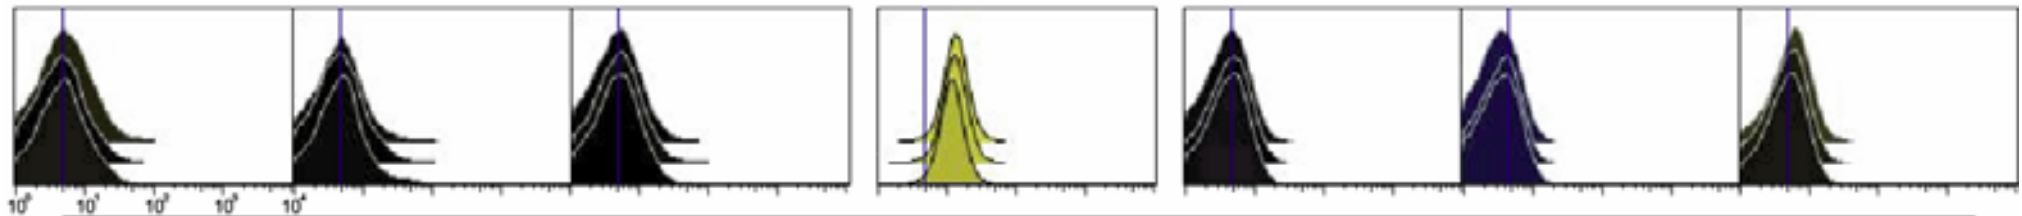

p-p38
