# Supplementary material
Source: PubMed Central journal article supplement (PMC1895530)
Supplement: blood_blood-2006-02-003921_4.pdf [file blood_blood-2006-02-003921_4.pdf]

$\alpha$ - $\mu/\gamma$  Stimulated,  
Gated CD20<sup>+</sup>

TIL B

FL

0 4 30

0 4 30

FL-P07

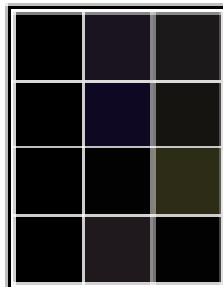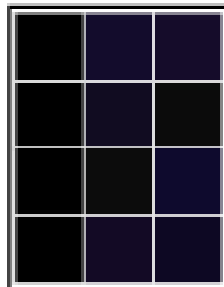

p-Btk  
p-Syk  
p-Erk1/2  
p-p38

FL-P08

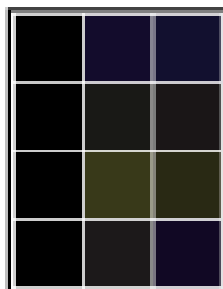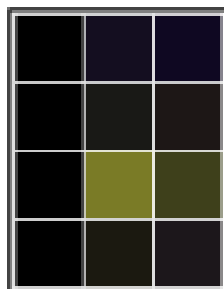

p-Btk  
p-Syk  
p-Erk1/2  
p-p38

FL-P09

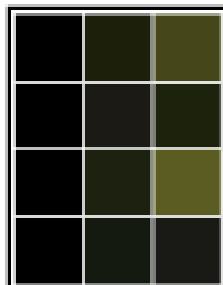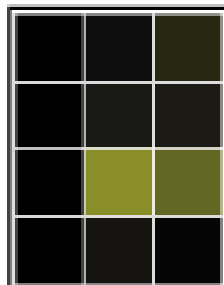

p-Btk  
p-Syk  
p-Erk1/2  
p-p38

FL-P11

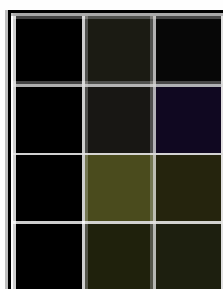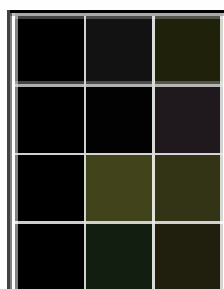

p-Btk  
p-Syk  
p-Erk1/2  
p-p38

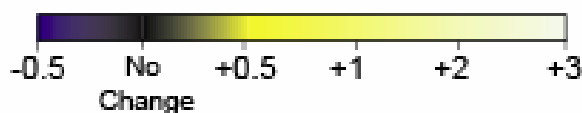

$\log_{10}$  [ stimulated / unstimulated ]
