# Supplementary material
Source: PubMed Central journal article supplement (PMC1895530)

**A**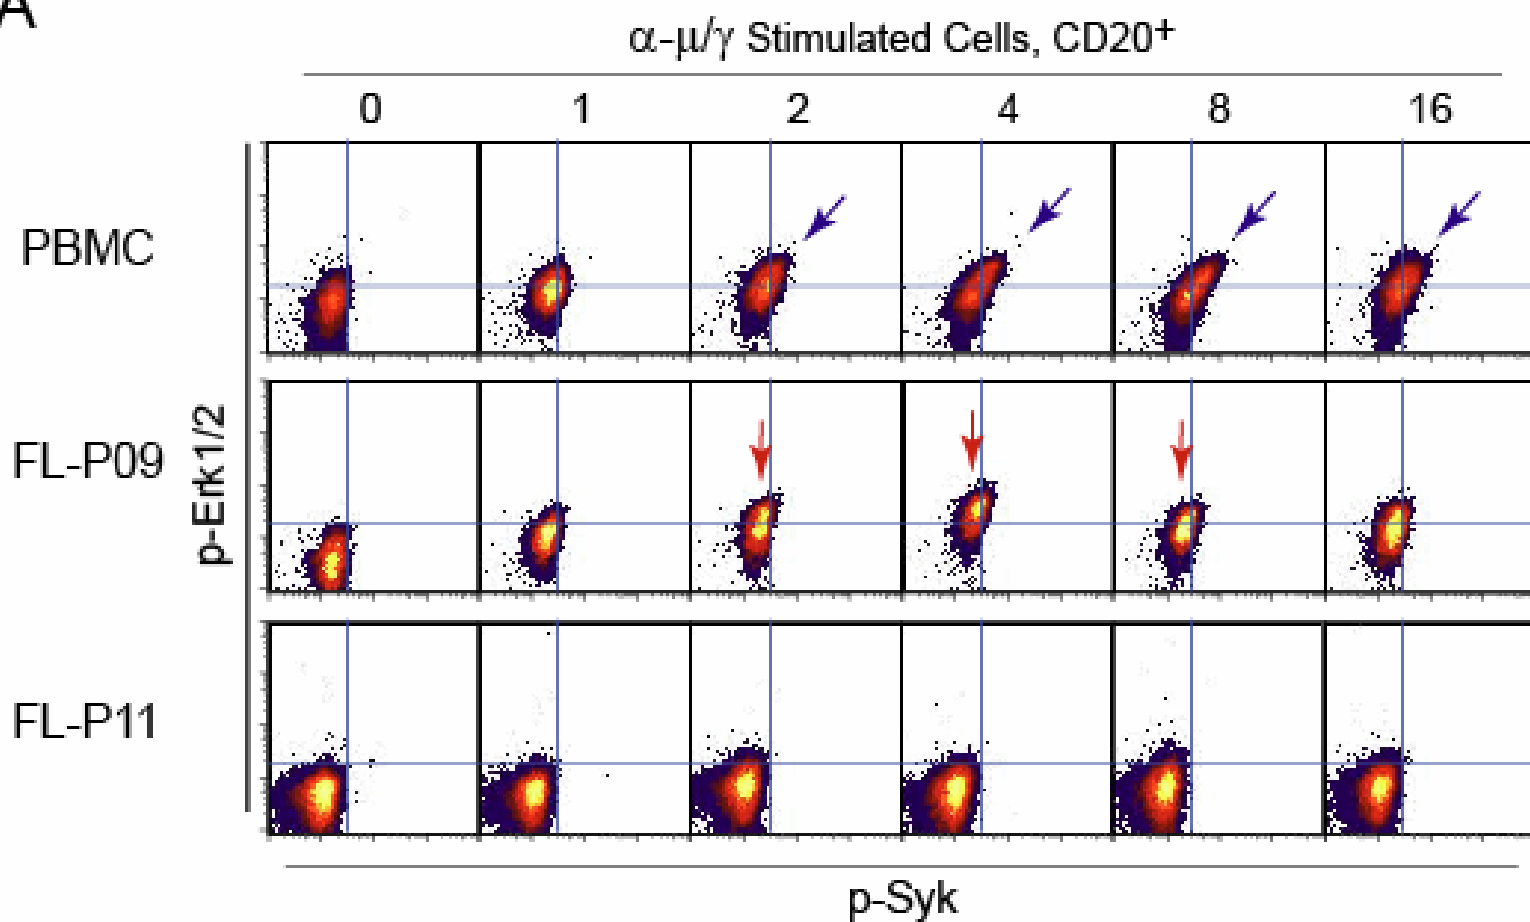**B**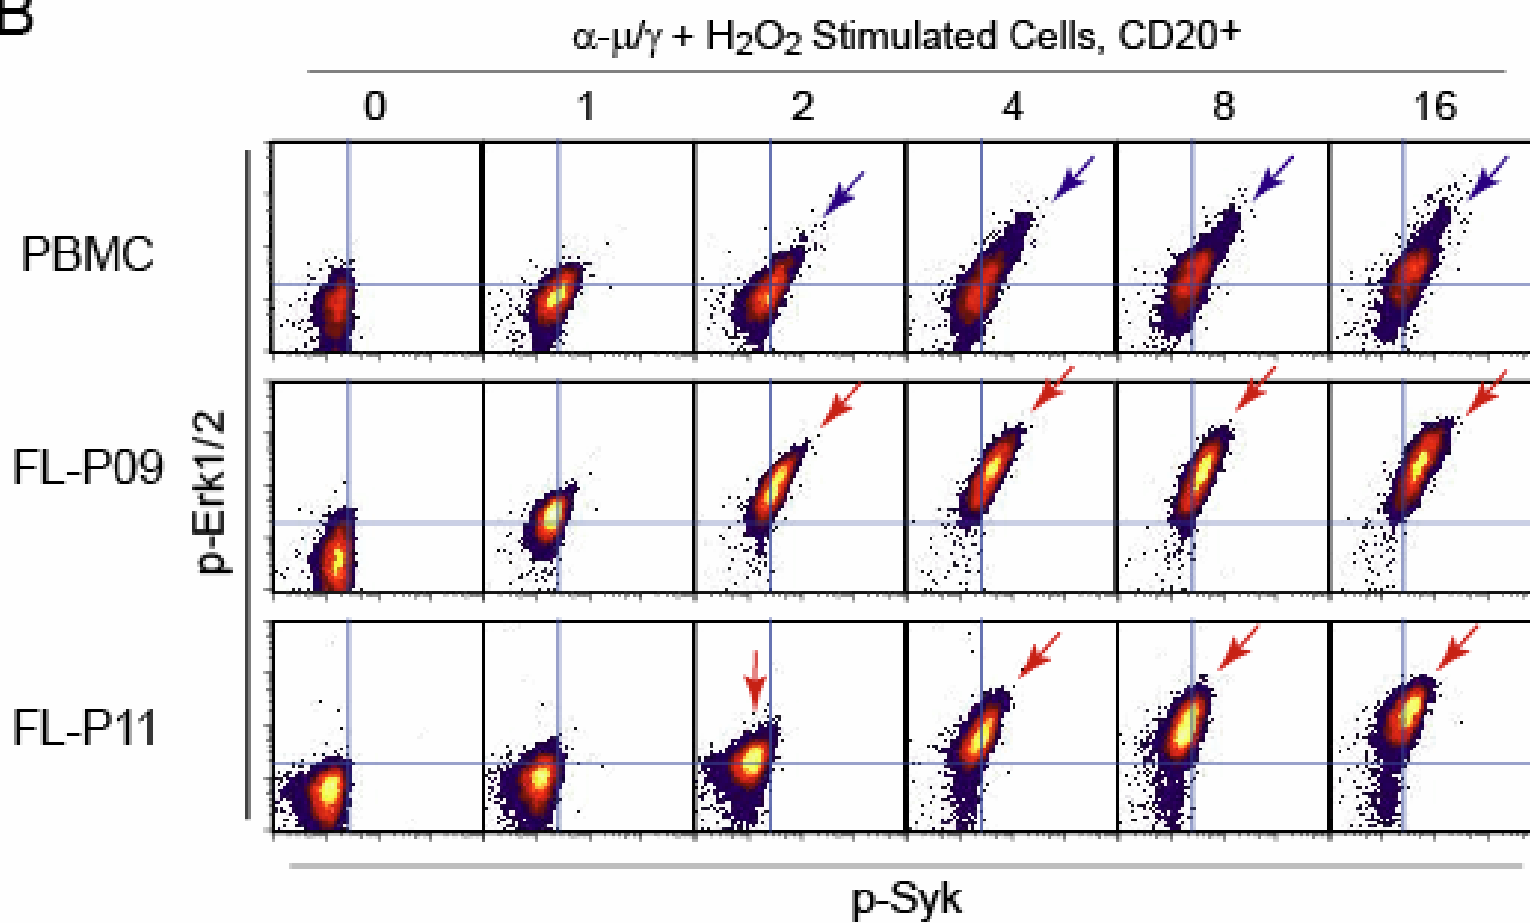

Supplement: blood_blood-2006-02-003921_2.pdf [file blood_blood-2006-02-003921_2.pdf]

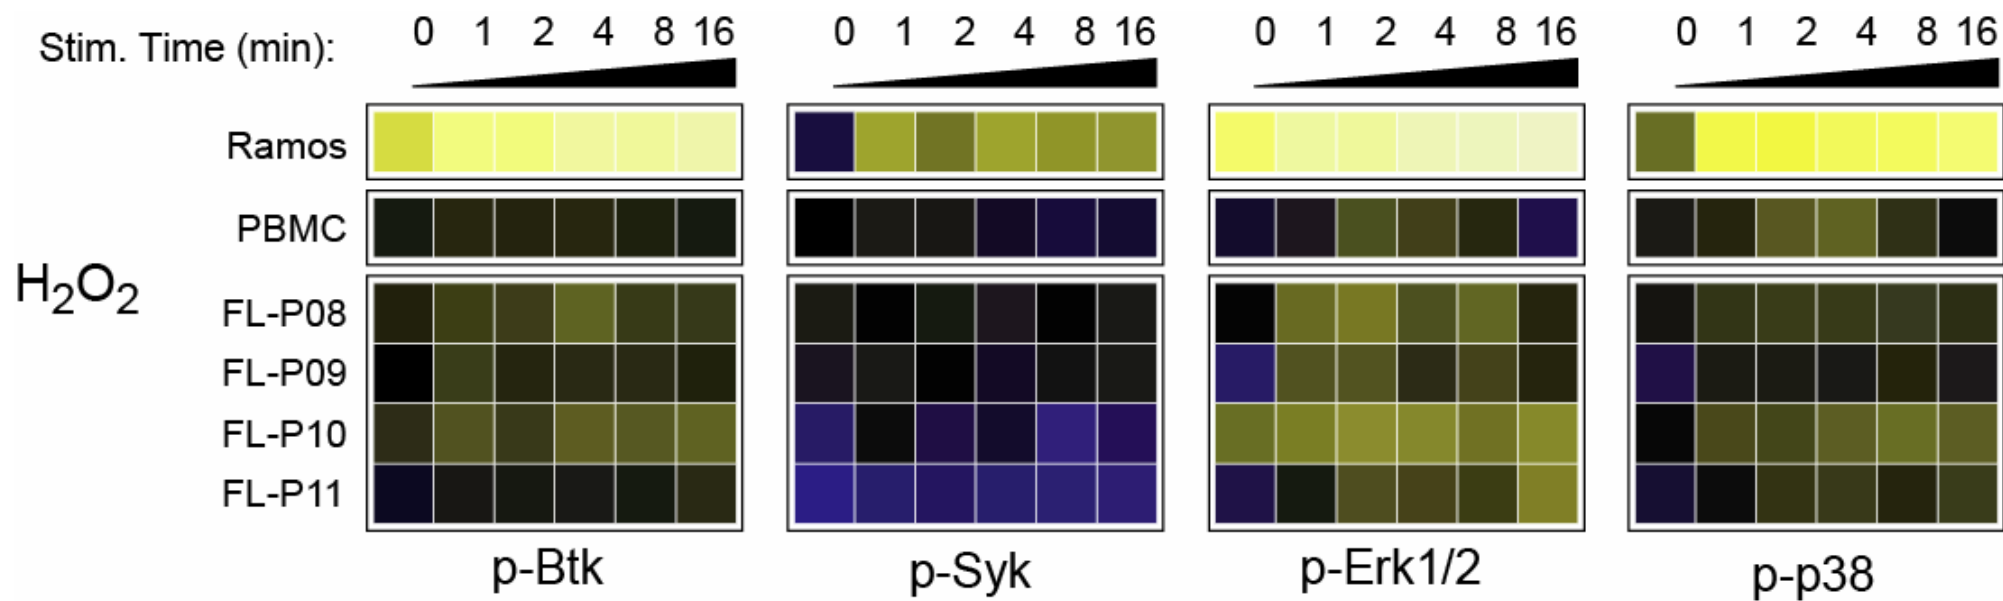

Universal Control: PBMC 0' (unstimulated)

All CD20<sup>+</sup> Cells Shown

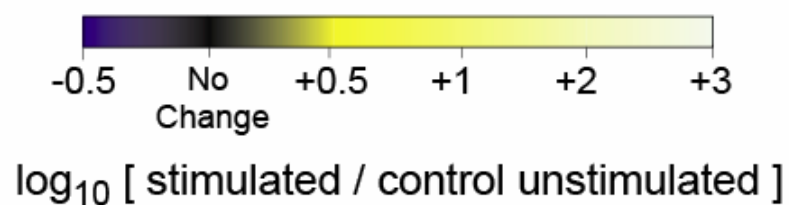

Supplement: blood_blood-2006-02-003921_3.pdf [file blood_blood-2006-02-003921_3.pdf]
